# Supplementary material for: Gas-phase detection of oxirene
Source: PubMed Central journal article supplement — Sci Adv. 2023 Mar 10;9(10):eadg1134. doi: 10.1126/sciadv.adg1134 (PMC10005165; doi:10.1126/sciadv.adg1134), 2023-03-10
Supplement: sciadv.adg1134_sm.pdf [file sciadv.adg1134_sm.pdf]

Supplementary Materials for  
**Gas-phase detection of oxirene**

Jia Wang *et al.*

Corresponding author: Alexander M. Mebel, [mebela@fiu.edu](mailto:mebela@fiu.edu); André K. Eckhardt, [andre.eckhardt@rub.de](mailto:andre.eckhardt@rub.de);  
Ralf I. Kaiser, [ralfk@hawaii.edu](mailto:ralfk@hawaii.edu)

*Sci. Adv.* **9**, eadg1134 (2023)  
DOI: 10.1126/sciadv.adg1134

**This PDF file includes:**

Figs. S1 to S9  
Tables S1 to S11  
References

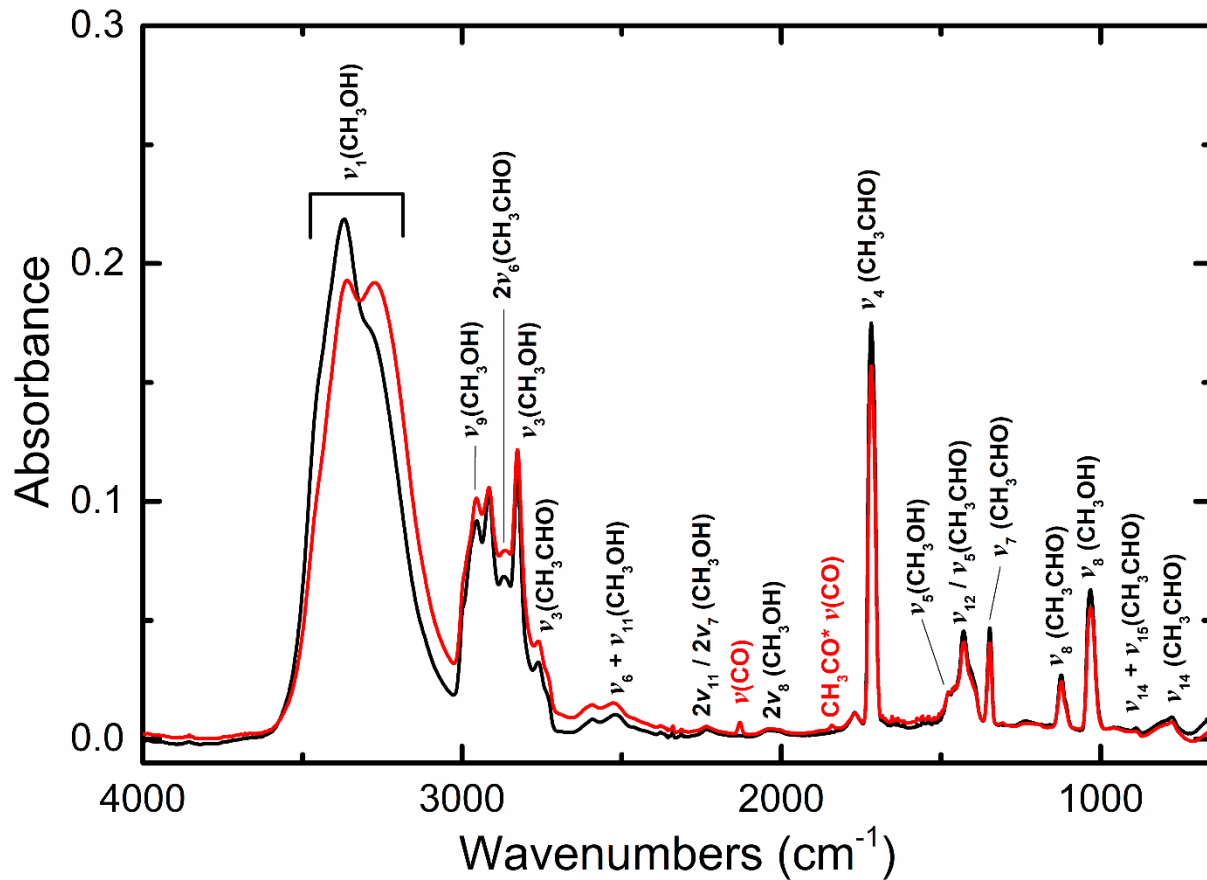

**Fig. S1.**

FTIR spectra of CH<sub>3</sub>OH-CH<sub>3</sub>CHO ices at 5 K before (black line) and after (red line) irradiation at 20 nA for 15 minutes. Detailed assignments are listed in table S1.

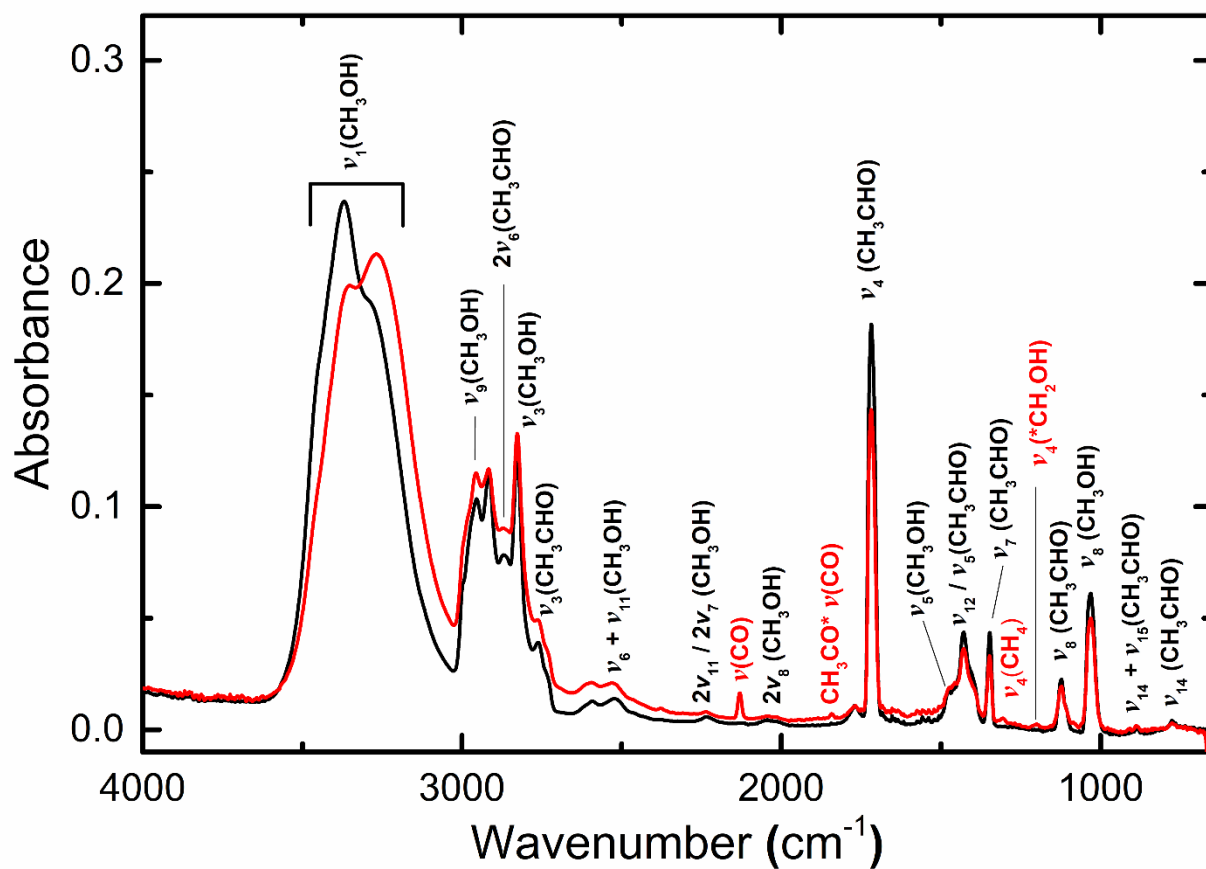

**Fig. S2.**

FTIR spectra of CH<sub>3</sub>OH-CH<sub>3</sub>CHO ice at 5 K before (black line) and after (red line) irradiation at 20 nA for 60 minutes. Detailed assignments are listed in table S2.

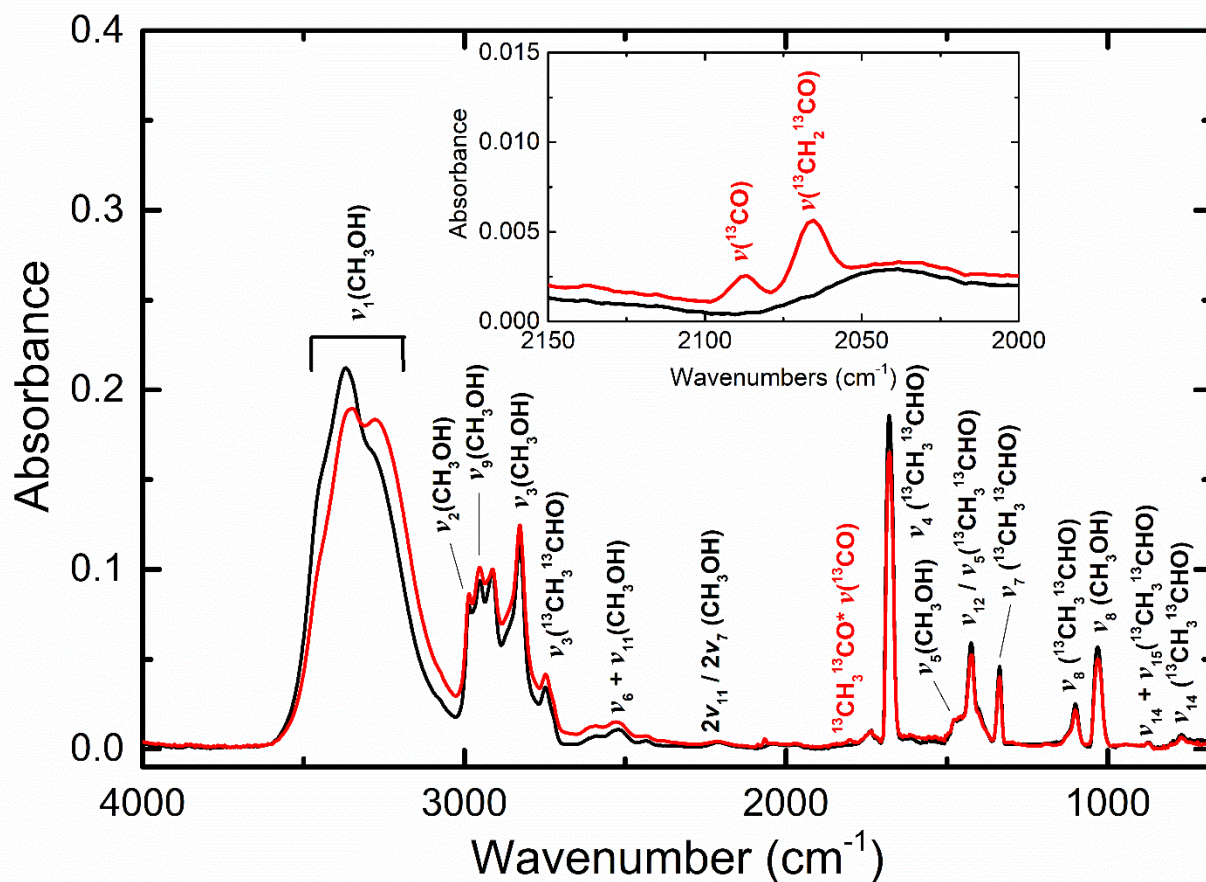

**Fig. S3.**

FTIR spectra of  $\text{CH}_3\text{OH}-^{13}\text{CH}_3^{13}\text{CHO}$  ices at 5 K before (black line) and after (red line) irradiation at 20 nA for 15 minutes. Detailed assignments are listed in table S3. Inset: Zoom in between 2150 and 2000  $\text{cm}^{-1}$  showing new peaks after irradiation corresponding to  $^{13}\text{CO}$  and ketene- $^{13}\text{C}_2$ .

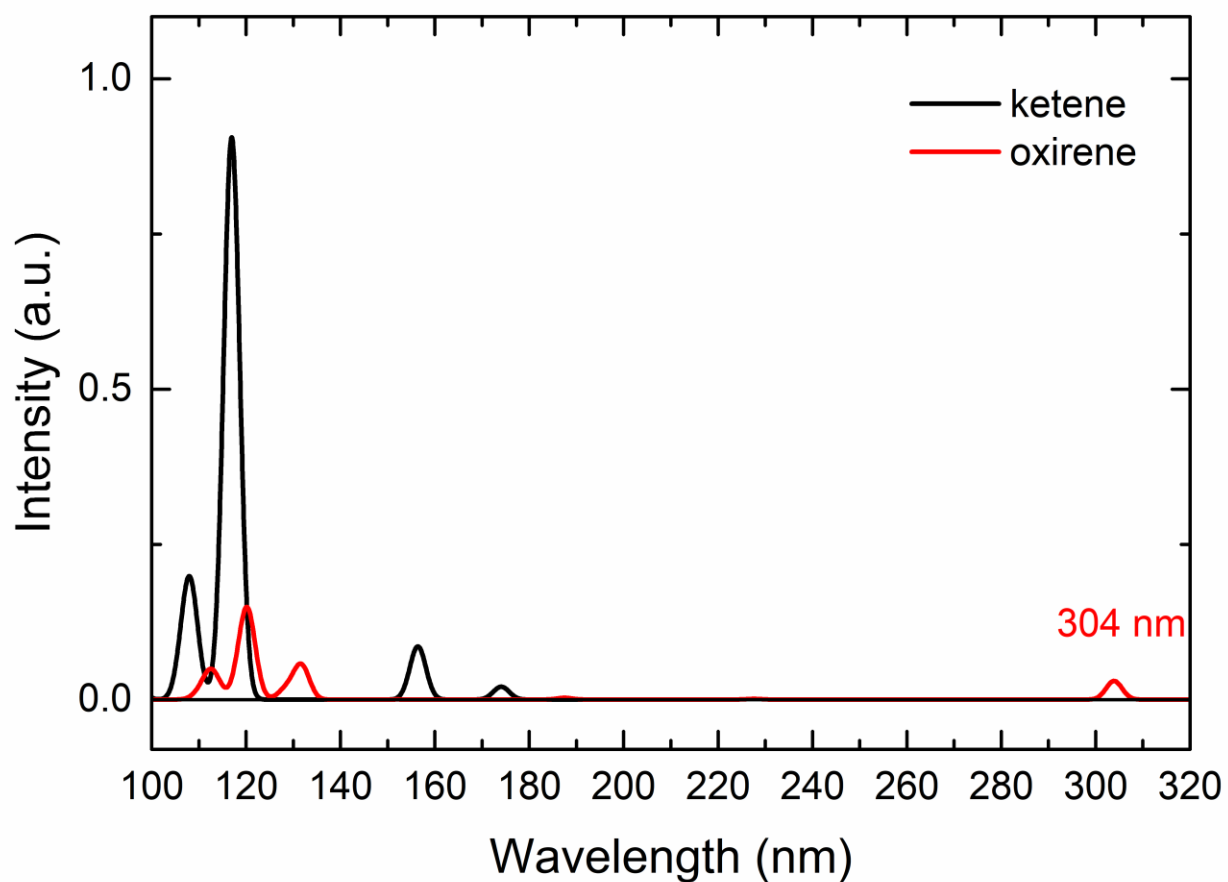

**Fig. S4.**

Simulated ultraviolet-visible (UV-Vis) spectra of ketene and oxirene calculated at the TD-PBE0/cc-pVTZ level of theory. The spectra were convoluted using a Gaussian line shape function with a full width at half maximum (FWHM) of 4 nm.

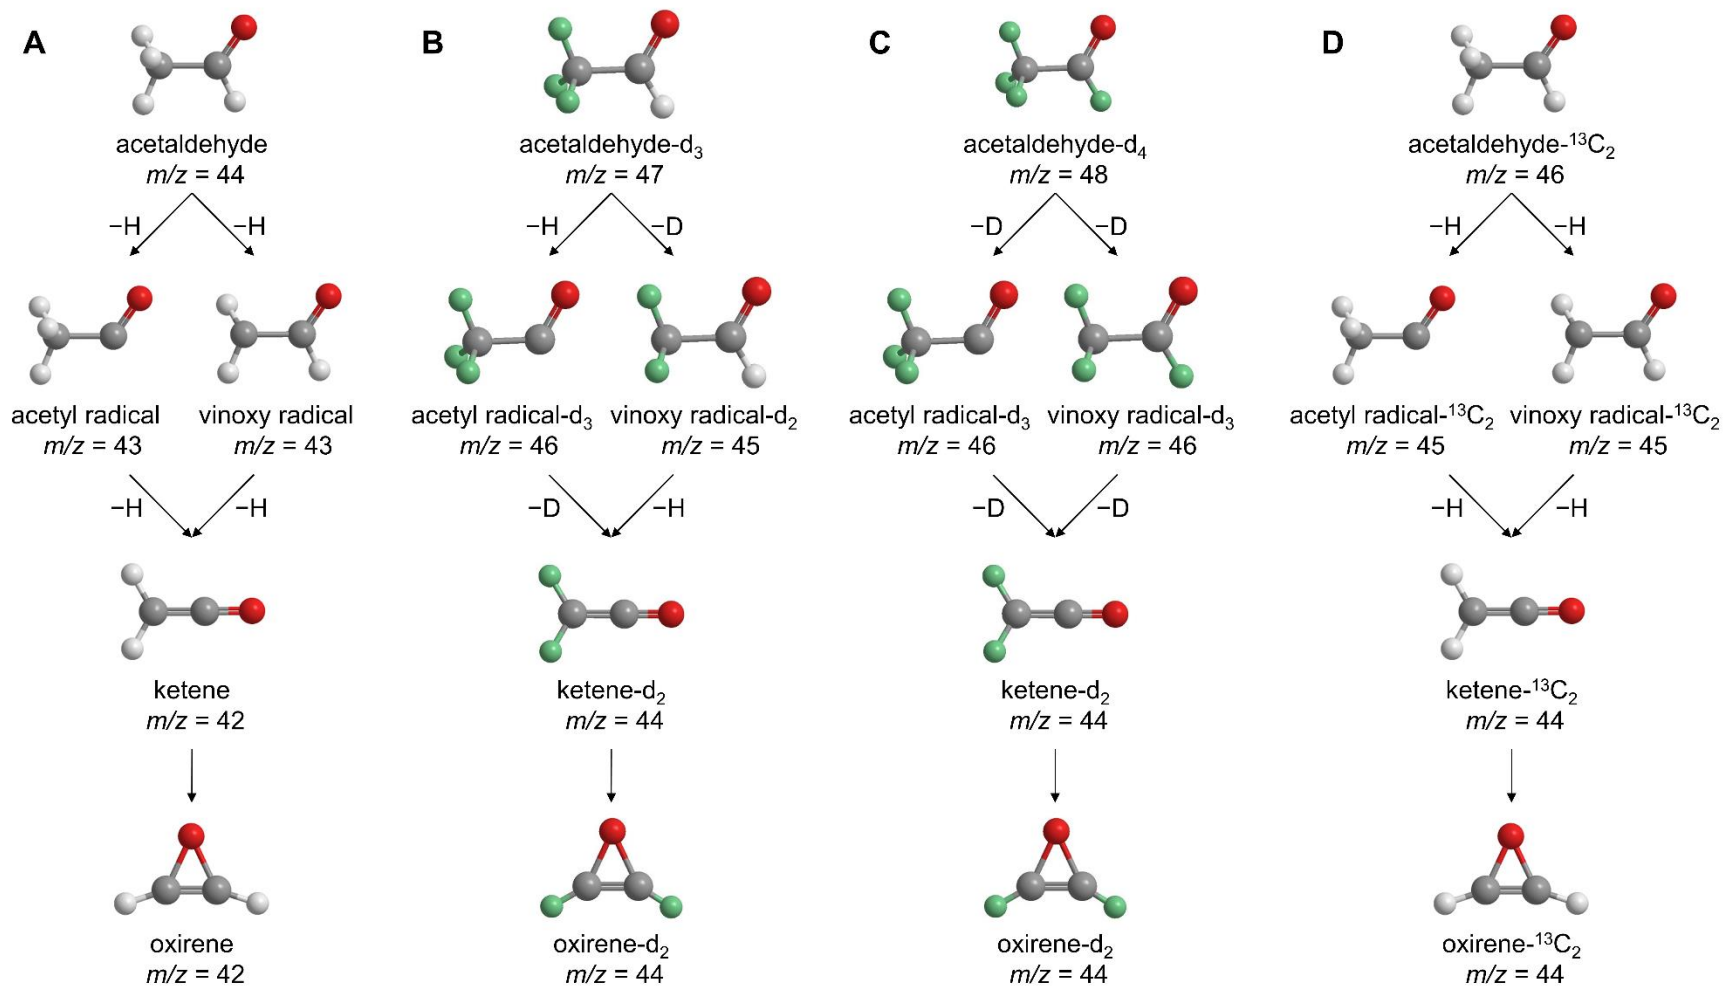

**Fig. S5.**

Formation schemes of ketene and oxirene. Reaction schemes showing pathways from acetaldehyde (A), acetaldehyde- $d_3$  (B), acetaldehyde- $d_4$  (C), and acetaldehyde- $^{13}C_2$  (D) to ketene and oxirene. The atoms are color-coded in white (hydrogen), light blue (deuterium), gray (carbon), and red (oxygen).

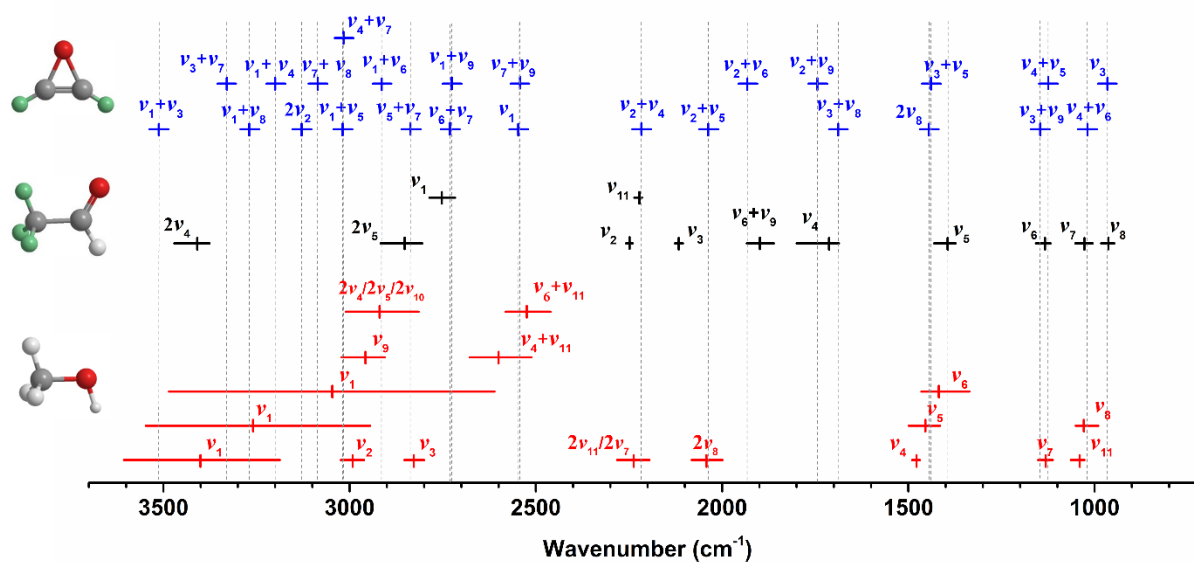

**Fig. S6. Peak absorptions (solid vertical lines) and absorption ranges (solid horizontal lines) of methanol ( $\text{CH}_3\text{OH}$ , red), acetaldehyde- $\text{d}_3$  ( $\text{CD}_3\text{CHO}$ , black), and oxirene- $\text{d}_2$  ( $c\text{-C}_2\text{D}_2\text{O}$ , blue). Dotted vertical lines indicate the overlap positions between the absorption peaks of oxirene- $\text{d}_2$  and reactants ( $\text{CH}_3\text{OH}$ , red;  $\text{CD}_3\text{CHO}$ , black). Detailed absorption positions and assignments for experimentally measured pure methanol and acetaldehyde- $\text{d}_3$  ices as well as calculated oxirene- $\text{d}_2$  are listed in table S6.**

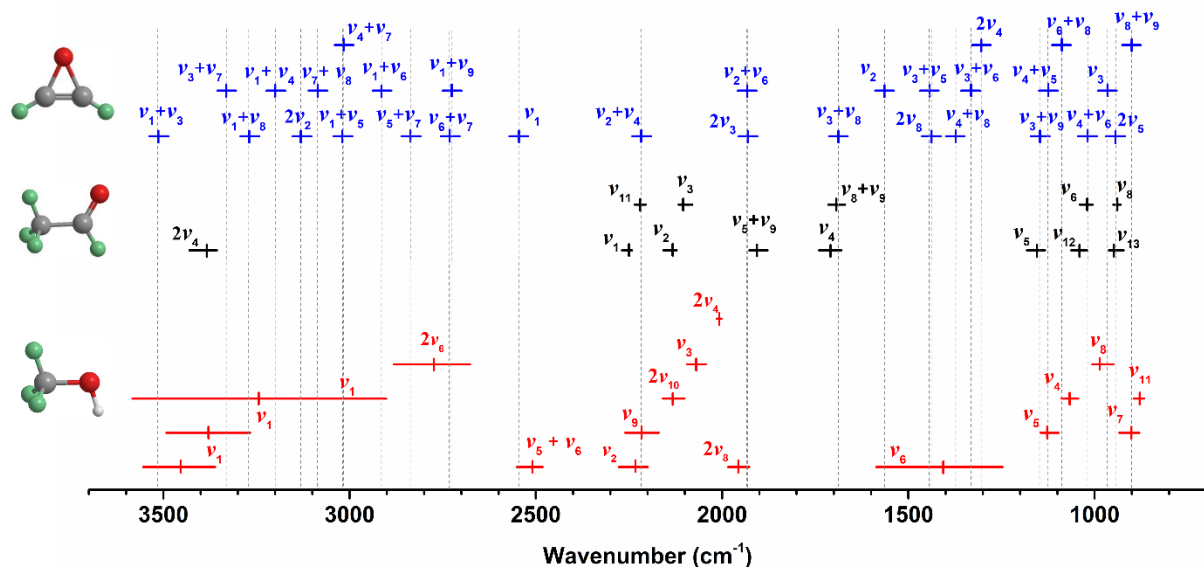

**Fig. S7.** Peak absorptions (solid vertical lines) and absorption ranges (solid horizontal lines) of methanol- $d_3$  ( $CD_3OH$ , red), acetaldehyde- $d_4$  ( $CD_3CDO$ , black), and oxirene- $d_2$  ( $c\text{-}C_2D_2O$ , blue). Dotted vertical lines indicate the overlap positions between the absorption peaks of oxirene- $d_2$  and reactants ( $CD_3OH$ , red;  $CD_3CDO$ , black). Detailed absorption positions and assignments for experimentally measured pure methanol- $d_3$  and acetaldehyde- $d_4$  ices as well as calculated oxirene- $d_2$  are listed in table S7.



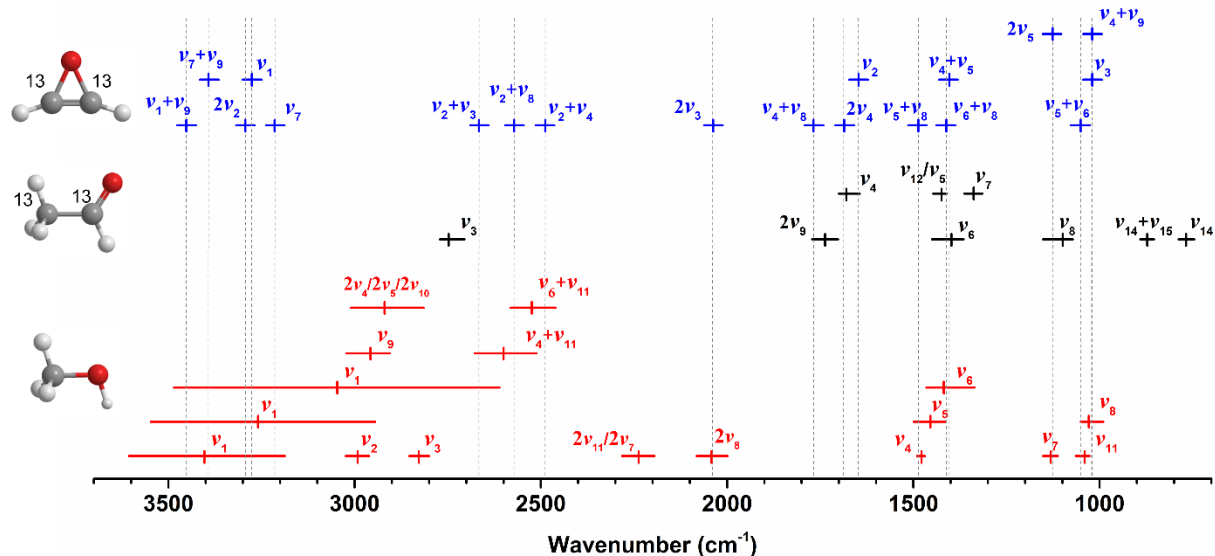

**Fig. S8.** Peak absorptions (solid vertical lines) and absorption ranges (solid horizontal lines) of methanol ( $\text{CH}_3\text{OH}$ , red), acetaldehyde- $^{13}\text{C}_2$  ( $^{13}\text{CH}_3^{13}\text{CHO}$ , black), and oxirene- $^{13}\text{C}_2$  ( $c\text{-}^{13}\text{C}_2\text{H}_2\text{O}$ , blue). Dotted vertical lines indicate the overlap positions between the absorption peaks of oxirene- $^{13}\text{C}_2$  and reactants ( $\text{CH}_3\text{OH}$ , red;  $^{13}\text{CH}_3^{13}\text{CHO}$ , black). Detailed absorption positions and assignments for experimentally measured methanol and acetaldehyde- $^{13}\text{C}_2$  ices as well as calculated oxirene- $^{13}\text{C}_2$  are listed in table S8.

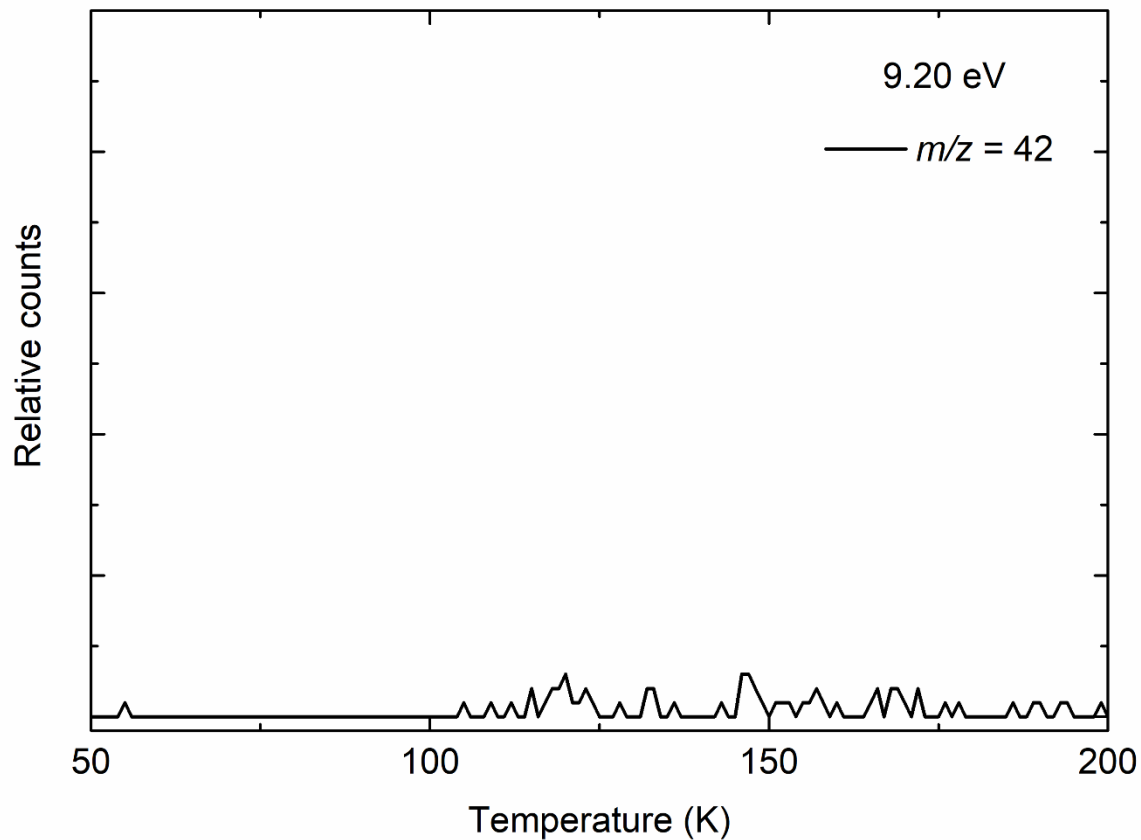

**Fig. S9.** PI-ReTOF-MS data recorded at 9.20 eV during the temperature-TPD phase of irradiated (20 nA, 15 minutes)  $\text{CH}_3\text{CHO}$  ice. TPD desorption profile of ion signal for  $m/z = 42$  shows no evidence for the formation of oxirene.

**Table S1.**

Absorption peaks observed in CH<sub>3</sub>OH–CH<sub>3</sub>CHO ice before and after electron irradiation (20 nA, 15 minutes) at 5 K.

| Pristine ice, before irradiation (cm <sup>-1</sup> ) |                                                      |
|------------------------------------------------------|------------------------------------------------------|
| CH <sub>3</sub> OH                                   | Assignment <sup>a</sup>                              |
| 3402, 3261, 3048                                     | v <sub>1</sub>                                       |
| 2991                                                 | v <sub>2</sub>                                       |
| 2955                                                 | v <sub>9</sub>                                       |
| 2914                                                 | 2v <sub>4</sub> / 2v <sub>5</sub> / 2v <sub>10</sub> |
| 2825                                                 | v <sub>3</sub>                                       |
| 2594                                                 | v <sub>4</sub> + v <sub>11</sub>                     |
| 2517                                                 | v <sub>6</sub> + v <sub>11</sub>                     |
| 2233                                                 | 2v <sub>11</sub> /2v <sub>7</sub>                    |
| 2038                                                 | 2v <sub>8</sub>                                      |
| 1475                                                 | v <sub>4</sub>                                       |
| 1455                                                 | v <sub>5</sub>                                       |
| 1420                                                 | v <sub>6</sub>                                       |
| 1033                                                 | v <sub>8</sub>                                       |
| CH <sub>3</sub> CHO                                  | Assignment <sup>b</sup>                              |
| 2866                                                 | 2v <sub>6</sub>                                      |
| 2760                                                 | v <sub>3</sub>                                       |
| 1767                                                 | 2v <sub>9</sub>                                      |
| 1718                                                 | v <sub>4</sub>                                       |
| 1430                                                 | v <sub>12</sub> / v <sub>5</sub>                     |
| 1392                                                 | v <sub>6</sub>                                       |
| 1345                                                 | v <sub>7</sub>                                       |
| 1122                                                 | v <sub>8</sub>                                       |
| 887                                                  | v <sub>14</sub> + v <sub>15</sub>                    |
| 777                                                  | v <sub>14</sub>                                      |
| New absorption after irradiation (cm <sup>-1</sup> ) |                                                      |
|                                                      | Assignment <sup>b</sup>                              |
| 2130                                                 | v(CO)                                                |
| 1842                                                 | CH <sub>3</sub> C $\dot{O}$ v(CO)                    |

<sup>a</sup> Assignments based on references (29, 71).

<sup>b</sup> Assignments based on reference (30).

**Table S2.**

Absorption peaks observed in CH<sub>3</sub>OH–CH<sub>3</sub>CHO ice before and after electron irradiation (20 nA, 60 minutes) at 5 K.

| Pristine ice, before irradiation (cm <sup>-1</sup> ) |                                                      |
|------------------------------------------------------|------------------------------------------------------|
| CH <sub>3</sub> OH                                   | Assignment <sup>a</sup>                              |
| 3402, 3261, 3048                                     | v <sub>1</sub>                                       |
| 2993                                                 | v <sub>2</sub>                                       |
| 2955                                                 | v <sub>9</sub>                                       |
| 2920                                                 | 2v <sub>4</sub> / 2v <sub>5</sub> / 2v <sub>10</sub> |
| 2824                                                 | v <sub>3</sub>                                       |
| 2598                                                 | v <sub>4</sub> + v <sub>11</sub>                     |
| 2521                                                 | v <sub>6</sub> + v <sub>11</sub>                     |
| 2237                                                 | 2v <sub>11</sub> /2v <sub>7</sub>                    |
| 2038                                                 | 2v <sub>8</sub>                                      |
| 1475                                                 | v <sub>4</sub>                                       |
| 1455                                                 | v <sub>5</sub>                                       |
| 1420                                                 | v <sub>6</sub>                                       |
| 1029                                                 | v <sub>8</sub>                                       |
| CH <sub>3</sub> CHO                                  | Assignment <sup>b</sup>                              |
| 2866                                                 | 2v <sub>6</sub>                                      |
| 2760                                                 | v <sub>3</sub>                                       |
| 1767                                                 | 2v <sub>9</sub>                                      |
| 1718                                                 | v <sub>4</sub>                                       |
| 1431                                                 | v <sub>12</sub> / v <sub>5</sub>                     |
| 1392                                                 | v <sub>6</sub>                                       |
| 1345                                                 | v <sub>7</sub>                                       |
| 1122                                                 | v <sub>8</sub>                                       |
| 887                                                  | v <sub>14</sub> + v <sub>15</sub>                    |
| 773                                                  | v <sub>14</sub>                                      |
| New absorption after irradiation (cm <sup>-1</sup> ) |                                                      |
|                                                      | Assignment <sup>c</sup>                              |
| 2129                                                 | v (CO)                                               |
| 1840                                                 | CH <sub>3</sub> C $\dot{O}$ v(CO)                    |
| 1306                                                 | v <sub>4</sub> (CH <sub>4</sub> )                    |
| 1199                                                 | v <sub>4</sub> ( $\dot{C}$ H <sub>2</sub> OH)        |

<sup>a</sup> Assignments based on references (29, 71).

<sup>b</sup> Assignments based on reference (30).

<sup>c</sup> Assignments based on references (29, 30).

**Table S3.**

Absorption peaks observed in  $\text{CH}_3\text{OH}-^{13}\text{CH}_3^{13}\text{CHO}$  ice before and after electron irradiation (20 nA, 15 minutes) at 5 K.

| Pristine ice, before irradiation ( $\text{cm}^{-1}$ ) |                                                                   |
|-------------------------------------------------------|-------------------------------------------------------------------|
| $\text{CH}_3\text{OH}$                                | Assignment <sup>a</sup>                                           |
| 3402, 3261, 3048                                      | $\nu_1$                                                           |
| 2983                                                  | $\nu_2$                                                           |
| 2954                                                  | $\nu_9$                                                           |
| 2912                                                  | $2\nu_4 / 2\nu_5 / 2\nu_{10}$                                     |
| 2826                                                  | $\nu_3$                                                           |
| 2596                                                  | $\nu_4 + \nu_{11}$                                                |
| 2520                                                  | $\nu_6 + \nu_{11}$                                                |
| 2229                                                  | $2\nu_{11}/2\nu_7$                                                |
| 1476                                                  | $\nu_4$                                                           |
| 1455                                                  | $\nu_5$                                                           |
| 1032                                                  | $\nu_8$                                                           |
| $^{13}\text{CH}_3^{13}\text{CHO}$                     | Assignment                                                        |
| 2748                                                  | $\nu_3$                                                           |
| 1738                                                  | $2\nu_9$                                                          |
| 1678                                                  | $\nu_4$                                                           |
| 1423                                                  | $\nu_{12} / \nu_5$                                                |
| 1397                                                  | $\nu_6$                                                           |
| 1336                                                  | $\nu_7$                                                           |
| 1102                                                  | $\nu_8$                                                           |
| 871                                                   | $\nu_{14} + \nu_{15}$                                             |
| 768                                                   | $\nu_{14}$                                                        |
| New absorption after irradiation ( $\text{cm}^{-1}$ ) | Assignment                                                        |
| 2087                                                  | $\nu(^{13}\text{CO})^b$                                           |
| 2066                                                  | $\nu(^{13}\text{CH}_2^{13}\text{CO})^b$                           |
| 1802                                                  | $^{13}\text{CH}_3^{13}\text{C}\dot{\text{O}} \nu(^{13}\text{CO})$ |

<sup>a</sup> Assignments based on references (29, 71).

<sup>b</sup> Assignments based on reference (31).

**Table S4.**

Absorption positions of methanol (CH<sub>3</sub>OH), acetaldehyde (CH<sub>3</sub>CHO), and oxirene (*c*-C<sub>2</sub>H<sub>2</sub>O). The numbers in brackets show the widths of the peaks observed in pure methanol or acetaldehyde ice (54, 72).

| Absorptions of methanol (cm <sup>-1</sup> )                        | Assignment <sup>a</sup>                              |
|--------------------------------------------------------------------|------------------------------------------------------|
| 3402 (419), 3261 (602), 3048 (874)                                 | v <sub>1</sub>                                       |
| 2993 (63)                                                          | v <sub>2</sub>                                       |
| 2956 (116)                                                         | v <sub>9</sub>                                       |
| 2920 (195)                                                         | 2v <sub>4</sub> / 2v <sub>5</sub> / 2v <sub>10</sub> |
| 2828 (53)                                                          | v <sub>3</sub>                                       |
| 2600 (166)                                                         | v <sub>4</sub> + v <sub>11</sub>                     |
| 2525 (120)                                                         | v <sub>6</sub> + v <sub>11</sub>                     |
| 2237 (87)                                                          | 2v <sub>11</sub> /2v <sub>7</sub>                    |
| 2042 (83)                                                          | 2v <sub>8</sub>                                      |
| 1478 (21)                                                          | v <sub>4</sub>                                       |
| 1455 (84)                                                          | v <sub>5</sub>                                       |
| 1420 (129)                                                         | v <sub>6</sub>                                       |
| 1130 (40)                                                          | v <sub>7</sub>                                       |
| 1040 (37)                                                          | v <sub>11</sub>                                      |
| 1030 (61)                                                          | v <sub>8</sub>                                       |
| Absorptions of acetaldehyde (cm <sup>-1</sup> )                    | Assignment <sup>b</sup>                              |
| 3416 (58)                                                          | 2v <sub>4</sub>                                      |
| 3001 (51)                                                          | v <sub>1</sub>                                       |
| 2916 (35)                                                          | v <sub>2</sub>                                       |
| 2865 (97)                                                          | 2v <sub>6</sub>                                      |
| 2759 (85)                                                          | v <sub>3</sub>                                       |
| 1769 (55)                                                          | 2v <sub>9</sub>                                      |
| 1718 (46)                                                          | v <sub>4</sub>                                       |
| 1430 (50)                                                          | v <sub>12</sub> / v <sub>5</sub>                     |
| 1392 (27)                                                          | v <sub>6</sub>                                       |
| 1347 (39)                                                          | v <sub>7</sub>                                       |
| 1123 (45)                                                          | v <sub>8</sub>                                       |
| 886 (38)                                                           | v <sub>14</sub> + v <sub>15</sub>                    |
| 772 (43)                                                           | v <sub>14</sub>                                      |
| Calculated absorptions of oxirene (cm <sup>-1</sup> ) <sup>c</sup> | Assignment <sup>c</sup>                              |
| 3419                                                               | v <sub>1</sub> + v <sub>9</sub>                      |
| 3402                                                               | 2v <sub>2</sub>                                      |
| 3338                                                               | v <sub>7</sub> + v <sub>9</sub>                      |
| 3282                                                               | v <sub>1</sub>                                       |
| 3201                                                               | v <sub>7</sub>                                       |
| 2740                                                               | v <sub>2</sub> + v <sub>3</sub>                      |
| 2625                                                               | v <sub>2</sub> + v <sub>8</sub>                      |
| 2549                                                               | v <sub>2</sub> + v <sub>4</sub>                      |
| 2244                                                               | v <sub>2</sub> + v <sub>5</sub>                      |
| 1772                                                               | v <sub>4</sub> + v <sub>8</sub>                      |

|      |                 |
|------|-----------------|
| 1701 | $\nu_2$         |
| 1696 | $2\nu_4$        |
| 1467 | $\nu_5 + \nu_8$ |
| 1401 | $\nu_6 + \nu_8$ |
| 1391 | $\nu_4 + \nu_5$ |
| 1325 | $\nu_4 + \nu_6$ |
| 1061 | $\nu_8 + \nu_9$ |
| 1039 | $\nu_3$         |
| 1020 | $\nu_5 + \nu_6$ |
| 924  | $\nu_8$         |
| 848  | $\nu_4$         |
| 543  | $\nu_5$         |
| 477  | $\nu_6$         |
| 137  | $\nu_9$         |

---

<sup>a</sup> Assignments based on references (29, 71).

<sup>b</sup> Assignments based on reference (30).

<sup>c</sup> Calculated frequencies obtained from CCCBDB Vibrational Listing Page (nist.gov), computed at the CCSD(T)=FULL/cc-pVTZ level. The frequency error of oxirene is estimated to be 25 cm<sup>-1</sup>.

**Table S5.**

Error analysis of adiabatic ionization energies (IEs) and relative energies ( $\Delta E$ ) of distinct C<sub>2</sub>H<sub>2</sub>O isomers; IEs and  $\Delta E$  were computed at the CCSD(T)/CBS(aug-T,Q)//CCSD(T)/aug-cc-pVTZ level of theory including the zero-point vibrational energy corrections. An offset of 0.03 eV was subtracted to correct for the electric field effect. The computed Cartesian coordinates and vibrational frequencies are shown in table S11. The combined error limits of  $-0.05$  -  $+0.03$  eV were used based on the calculated ionization energies and experimental ionization energies of different carbon-, hydrogen-, and oxygen- containing compounds (73).

| Isomer                                 | Structure | $\Delta E$<br>(kJ mol <sup>-1</sup> ) | Experimental<br>IE (eV) | Computed<br>IE (eV) | IE range<br>after error<br>analysis<br>(eV) | Corrected IE<br>with electric<br>field effect<br>(eV) |
|----------------------------------------|-----------|---------------------------------------|-------------------------|---------------------|---------------------------------------------|-------------------------------------------------------|
| <b>1</b><br>Oxirene                    |           | 314                                   |                         | 8.66                | 8.61 – 8.69                                 | 8.58 – 8.66                                           |
| <b>2</b><br>Ketene                     |           | 0                                     | 9.617 ± 0.003<br>(25)   | 9.61                | 9.56 – 9.64                                 | 9.53 – 9.61                                           |
| <b>3</b><br>Oxiranylidene              |           | 256                                   |                         | 9.85                | 9.80 – 9.88                                 | 9.77 – 9.85                                           |
| <b>4</b><br>Ethyneol                   |           | 139                                   |                         | 10.03               | 9.98 –<br>10.06                             | 9.95 – 10.03                                          |
| <b>5</b><br>Formylcarbene<br>(triplet) |           | 311                                   |                         | 6.38                | 6.33 – 6.41                                 | 6.30 – 6.38                                           |
| Acetone                                |           |                                       | 9.703 ± 0.006           | 9.71                |                                             |                                                       |
| Propanal                               |           |                                       | 9.96 ± 0.01             | 9.97                |                                             |                                                       |
| Propylene oxide                        |           |                                       | 10.22 ± 0.02            | 10.24               |                                             |                                                       |
| 2-Propen-1-ol                          |           |                                       | 9.67 ± 0.03             | 9.65                |                                             |                                                       |
| Methanol                               |           |                                       | 10.84 ± 0.01            | 10.86               |                                             |                                                       |
| Propadienone                           |           |                                       | 9.12 ± 0.05             | 9.15                |                                             |                                                       |
| Formaldehyde                           |           |                                       | 10.88 ± 0.01            | 10.89               |                                             |                                                       |
| Acetaldehyde                           |           |                                       | 10.229 ±<br>0.0007      | 10.24               |                                             |                                                       |



**Table S6.**

Absorption positions of methanol (CH<sub>3</sub>OH), acetaldehyde-d<sub>3</sub> (CD<sub>3</sub>CHO), and oxirene-d<sub>2</sub> (*c*-C<sub>2</sub>D<sub>2</sub>O). The numbers in brackets show the widths of the peaks observed in pure methanol or acetaldehyde-d<sub>3</sub> ice (55, 30).

| Absorptions of methanol (cm <sup>-1</sup> )                                       | Assignment <sup>a</sup>                              |
|-----------------------------------------------------------------------------------|------------------------------------------------------|
| 3402 (419), 3261 (602), 3048 (874)                                                | v <sub>1</sub>                                       |
| 2993 (63)                                                                         | v <sub>2</sub>                                       |
| 2956 (116)                                                                        | v <sub>9</sub>                                       |
| 2920 (195)                                                                        | 2v <sub>4</sub> / 2v <sub>5</sub> / 2v <sub>10</sub> |
| 2828 (53)                                                                         | v <sub>3</sub>                                       |
| 2600 (166)                                                                        | v <sub>4</sub> + v <sub>11</sub>                     |
| 2525 (120)                                                                        | v <sub>6</sub> + v <sub>11</sub>                     |
| 2237 (87)                                                                         | 2v <sub>11</sub> /2v <sub>7</sub>                    |
| 2042 (83)                                                                         | 2v <sub>8</sub>                                      |
| 1478 (21)                                                                         | v <sub>4</sub>                                       |
| 1455 (84)                                                                         | v <sub>5</sub>                                       |
| 1420 (129)                                                                        | v <sub>6</sub>                                       |
| 1130 (40)                                                                         | v <sub>7</sub>                                       |
| 1040 (37)                                                                         | v <sub>11</sub>                                      |
| 1030 (61)                                                                         | v <sub>8</sub>                                       |
| Absorptions of acetaldehyde-d <sub>3</sub> (cm <sup>-1</sup> )                    | Assignment <sup>b</sup>                              |
| 3405 (95)                                                                         | 2v <sub>4</sub>                                      |
| 2853 (112)                                                                        | 2v <sub>5</sub>                                      |
| 2749 (69)                                                                         | v <sub>1</sub>                                       |
| 2252 (18)                                                                         | v <sub>2</sub>                                       |
| 2228 (21)                                                                         | v <sub>11</sub>                                      |
| 2118 (22)                                                                         | v <sub>3</sub>                                       |
| 1890 (73)                                                                         | v <sub>6</sub> + v <sub>9</sub>                      |
| 1711 (114)                                                                        | v <sub>4</sub>                                       |
| 1397 (58)                                                                         | v <sub>5</sub>                                       |
| 1138 (40)                                                                         | v <sub>6</sub>                                       |
| 1029 (47)                                                                         | v <sub>7</sub>                                       |
| 963 (36)                                                                          | v <sub>8</sub>                                       |
| Calculated absorptions of oxirene-d <sub>2</sub> (cm <sup>-1</sup> ) <sup>c</sup> | Assignment <sup>c</sup>                              |
| 3512                                                                              | v <sub>1</sub> + v <sub>3</sub>                      |
| 3330                                                                              | v <sub>3</sub> + v <sub>7</sub>                      |
| 3268                                                                              | v <sub>1</sub> + v <sub>8</sub>                      |
| 3198                                                                              | v <sub>1</sub> + v <sub>4</sub>                      |
| 3128                                                                              | 2v <sub>2</sub>                                      |
| 3085                                                                              | v <sub>7</sub> + v <sub>8</sub>                      |
| 3018                                                                              | v <sub>1</sub> + v <sub>5</sub>                      |
| 3015                                                                              | v <sub>4</sub> + v <sub>7</sub>                      |
| 2913                                                                              | v <sub>1</sub> + v <sub>6</sub>                      |
| 2835                                                                              | v <sub>5</sub> + v <sub>7</sub>                      |
| 2730                                                                              | v <sub>6</sub> + v <sub>7</sub>                      |

|      |                 |
|------|-----------------|
| 2725 | $\nu_1 + \nu_9$ |
| 2546 | $\nu_1$         |
| 2543 | $\nu_7 + \nu_9$ |
| 2216 | $\nu_2 + \nu_4$ |
| 2036 | $\nu_2 + \nu_5$ |
| 1931 | $\nu_2 + \nu_6$ |
| 1743 | $\nu_2 + \nu_9$ |
| 1688 | $\nu_3 + \nu_8$ |
| 1444 | $2\nu_8$        |
| 1438 | $\nu_3 + \nu_5$ |
| 1146 | $\nu_3 + \nu_9$ |
| 1124 | $\nu_4 + \nu_5$ |
| 1019 | $\nu_4 + \nu_6$ |
| 966  | $\nu_3$         |

---

<sup>a</sup> Assignments based on references (29, 71).

<sup>b</sup> Assignments based on reference (30).

<sup>c</sup> Calculated frequencies at CCSD(T)/aug-cc-pVTZ level of theory with scaled factor of 0.970. The frequency error is estimated to be 25 cm<sup>-1</sup>.

**Table S7.**

Absorption positions of methanol-d<sub>3</sub> (CD<sub>3</sub>OH), acetaldehyde-d<sub>4</sub> (CD<sub>3</sub>CDO), and oxirene-d<sub>2</sub> (*c*-C<sub>2</sub>D<sub>2</sub>O). The numbers in brackets show the widths of the peaks observed in pure methanol-d<sub>3</sub> or acetaldehyde-d<sub>4</sub> ice (72, 74).

| Absorptions of methanol-d <sub>3</sub> (cm <sup>-1</sup> )                        | Assignment <sup>a</sup>         |
|-----------------------------------------------------------------------------------|---------------------------------|
| 3460 (193), 3380 (225), 3250 (681)                                                | v <sub>1</sub>                  |
| 2780 (204)                                                                        | 2v <sub>6</sub>                 |
| 2509 (69)                                                                         | v <sub>5</sub> + v <sub>6</sub> |
| 2233 (77)                                                                         | v <sub>2</sub>                  |
| 2214 (90)                                                                         | v <sub>9</sub>                  |
| 2140 (58)                                                                         | 2v <sub>10</sub>                |
| 2070 (50)                                                                         | v <sub>3</sub>                  |
| 2009 (12)                                                                         | 2v <sub>4</sub>                 |
| 1958 (57)                                                                         | 2v <sub>8</sub>                 |
| 1414 (339)                                                                        | v <sub>6</sub>                  |
| 1123 (48)                                                                         | v <sub>5</sub>                  |
| 1067 (45)                                                                         | v <sub>4</sub>                  |
| 987 (57)                                                                          | v <sub>8</sub>                  |
| 898 (54)                                                                          | v <sub>7</sub>                  |
| 880 (28)                                                                          | v <sub>11</sub>                 |
| Absorptions of acetaldehyde-d <sub>4</sub> (cm <sup>-1</sup> )                    | Assignment <sup>b</sup>         |
| 3384 (74)                                                                         | 2v <sub>4</sub>                 |
| 2254 (27)                                                                         | v <sub>1</sub>                  |
| 2219 (30)                                                                         | v <sub>11</sub>                 |
| 2134 (36)                                                                         | v <sub>2</sub>                  |
| 2104 (37)                                                                         | v <sub>3</sub>                  |
| 1908 (49)                                                                         | v <sub>5</sub> + v <sub>9</sub> |
| 1709 (60)                                                                         | v <sub>4</sub>                  |
| 1693 (45)                                                                         | v <sub>8</sub> + v <sub>9</sub> |
| 1157 (49)                                                                         | v <sub>5</sub>                  |
| 1042 (43)                                                                         | v <sub>12</sub>                 |
| 1021 (35)                                                                         | v <sub>6</sub>                  |
| 952 (40)                                                                          | v <sub>13</sub>                 |
| 941 (20)                                                                          | v <sub>8</sub>                  |
| Calculated absorptions of oxirene-d <sub>2</sub> (cm <sup>-1</sup> ) <sup>c</sup> | Assignment <sup>c</sup>         |
| 3512                                                                              | v <sub>1</sub> + v <sub>3</sub> |
| 3330                                                                              | v <sub>3</sub> + v <sub>7</sub> |
| 3268                                                                              | v <sub>1</sub> + v <sub>8</sub> |
| 3198                                                                              | v <sub>1</sub> + v <sub>4</sub> |
| 3128                                                                              | 2v <sub>2</sub>                 |
| 3085                                                                              | v <sub>7</sub> + v <sub>8</sub> |
| 3018                                                                              | v <sub>1</sub> + v <sub>5</sub> |
| 3015                                                                              | v <sub>4</sub> + v <sub>7</sub> |
| 2913                                                                              | v <sub>1</sub> + v <sub>6</sub> |
| 2835                                                                              | v <sub>5</sub> + v <sub>7</sub> |

|      |                 |
|------|-----------------|
| 2730 | $\nu_6 + \nu_7$ |
| 2725 | $\nu_1 + \nu_9$ |
| 2546 | $\nu_1$         |
| 2216 | $\nu_2 + \nu_4$ |
| 1933 | $2\nu_3$        |
| 1931 | $\nu_2 + \nu_6$ |
| 1688 | $\nu_3 + \nu_8$ |
| 1564 | $\nu_2$         |
| 1444 | $2\nu_8$        |
| 1438 | $\nu_3 + \nu_5$ |
| 1374 | $\nu_4 + \nu_8$ |
| 1333 | $\nu_3 + \nu_6$ |
| 1304 | $2\nu_4$        |
| 1146 | $\nu_3 + \nu_9$ |
| 1124 | $\nu_4 + \nu_5$ |
| 1089 | $\nu_6 + \nu_8$ |
| 1019 | $\nu_4 + \nu_6$ |
| 966  | $\nu_3$         |
| 944  | $2\nu_5$        |
| 901  | $\nu_8 + \nu_9$ |

<sup>a</sup> Assignments based on references (74).

<sup>b</sup> Assignments based on reference (72).

<sup>c</sup> Calculated frequencies at CCSD(T)/aug-cc-pVTZ level of theory with scaled factor of 0.970. The frequency error is estimated to be  $25\text{ cm}^{-1}$ .

**Table S8.**

Absorption positions of methanol (CH<sub>3</sub>OH), acetaldehyde-<sup>13</sup>C<sub>2</sub> (<sup>13</sup>CH<sub>3</sub><sup>13</sup>CHO), and oxirene-<sup>13</sup>C<sub>2</sub> (*c*-<sup>13</sup>C<sub>2</sub>H<sub>2</sub>O). The numbers in brackets show the widths of the peaks observed in pure methanol ice (55) or determined in mixed CH<sub>3</sub>OH-<sup>13</sup>CH<sub>3</sub><sup>13</sup>CHO ice in this work (acetaldehyde-<sup>13</sup>C<sub>2</sub>).

| Absorptions of methanol (cm <sup>-1</sup> )                                                      | Assignment <sup>a</sup>                              |
|--------------------------------------------------------------------------------------------------|------------------------------------------------------|
| 3402 (419), 3261 (602), 3048 (874)                                                               | v <sub>1</sub>                                       |
| 2993 (63)                                                                                        | v <sub>2</sub>                                       |
| 2956 (116)                                                                                       | v <sub>9</sub>                                       |
| 2920 (195)                                                                                       | 2v <sub>4</sub> / 2v <sub>5</sub> / 2v <sub>10</sub> |
| 2828 (53)                                                                                        | v <sub>3</sub>                                       |
| 2600 (166)                                                                                       | v <sub>4</sub> + v <sub>11</sub>                     |
| 2525 (120)                                                                                       | v <sub>6</sub> + v <sub>11</sub>                     |
| 2237 (87)                                                                                        | 2v <sub>11</sub> /2v <sub>7</sub>                    |
| 2042 (83)                                                                                        | 2v <sub>8</sub>                                      |
| 1478 (21)                                                                                        | v <sub>4</sub>                                       |
| 1455 (84)                                                                                        | v <sub>5</sub>                                       |
| 1420 (129)                                                                                       | v <sub>6</sub>                                       |
| 1130 (40)                                                                                        | v <sub>7</sub>                                       |
| 1040 (37)                                                                                        | v <sub>11</sub>                                      |
| 1030 (61)                                                                                        | v <sub>8</sub>                                       |
| Absorptions of acetaldehyde- <sup>13</sup> C <sub>2</sub> (cm <sup>-1</sup> )                    | Assignment                                           |
| 2748 (66)                                                                                        | v <sub>3</sub>                                       |
| 1738 (70)                                                                                        | 2v <sub>9</sub>                                      |
| 1678 (56)                                                                                        | v <sub>4</sub>                                       |
| 1423 (36)                                                                                        | v <sub>12</sub> / v <sub>5</sub>                     |
| 1397 (85)                                                                                        | v <sub>6</sub>                                       |
| 1336 (48)                                                                                        | v <sub>7</sub>                                       |
| 1102 (80)                                                                                        | v <sub>8</sub>                                       |
| 871 (37)                                                                                         | v <sub>14</sub> + v <sub>15</sub>                    |
| 768 (42)                                                                                         | v <sub>14</sub>                                      |
| Calculated absorptions of oxirene- <sup>13</sup> C <sub>2</sub> (cm <sup>-1</sup> ) <sup>b</sup> | Assignment <sup>b</sup>                              |
| 3451                                                                                             | v <sub>1</sub> + v <sub>9</sub>                      |
| 3390                                                                                             | v <sub>7</sub> + v <sub>9</sub>                      |
| 3293                                                                                             | 2v <sub>2</sub>                                      |
| 3275                                                                                             | v <sub>1</sub>                                       |
| 3213                                                                                             | v <sub>7</sub>                                       |
| 2665                                                                                             | v <sub>2</sub> + v <sub>3</sub>                      |
| 2571                                                                                             | v <sub>2</sub> + v <sub>8</sub>                      |
| 2489                                                                                             | v <sub>2</sub> + v <sub>4</sub>                      |
| 2037                                                                                             | 2v <sub>3</sub>                                      |
| 1767                                                                                             | v <sub>4</sub> + v <sub>8</sub>                      |
| 1684                                                                                             | 2v <sub>4</sub>                                      |
| 1647                                                                                             | v <sub>2</sub>                                       |
| 1489                                                                                             | v <sub>5</sub> + v <sub>8</sub>                      |
| 1413                                                                                             | v <sub>6</sub> + v <sub>8</sub>                      |

|      |                 |
|------|-----------------|
| 1406 | $\nu_4 + \nu_5$ |
| 1128 | $2\nu_5$        |
| 1052 | $\nu_5 + \nu_6$ |
| 1019 | $\nu_4 + \nu_9$ |
| 1019 | $\nu_3$         |

---

<sup>a</sup> Assignments based on references (29, 71).

<sup>b</sup> Calculated frequencies at CCSD(T)/aug-cc-pVTZ level of theory with scaled factor of 0.970. The frequency error is estimated to be  $25 \text{ cm}^{-1}$ .

**Table S9.** Calculated CASPT2(16,14) single-point relative energies of various stationary structures along the oxirene → formylcarbene → ketene isomerization pathway with different basis sets and extrapolated to the CBS limit.<sup>a</sup>

|                                        | oxirene    | singlet<br>formylcarbene | triplet<br>formylcarbene | ketene        | oxiranylidene | TS1         | TS2         | TS3         |
|----------------------------------------|------------|--------------------------|--------------------------|---------------|---------------|-------------|-------------|-------------|
| CASPT2/cc-pVTZ                         | 0.0        | 0.6                      | -14.4                    | -318.0        | -50.9         | 12.0        | 34.8        | 11.5        |
| CASPT2/cc-pVQZ                         | 0.0        | 19.2                     | -7.8                     | -314.6        | -44.2         | 12.6        | 38.6        | 17.1        |
| CASPT2/cc-pV5Z                         | 0.0        | 21.3                     | 0.3                      | -307.2        | -41.1         | 13.5        | 44.1        | 20.5        |
| CASPT2/CBS(T,Q) <sup>b</sup>           | 0.0        | 32.1                     | -3.2                     | -312.2        | -39.6         | 13.1        | 41.2        | 21.0        |
| CASPT2/CBS(Q,5) <sup>c</sup>           | 0.0        | 23.3                     | 7.8                      | -300.3        | -38.1         | 14.2        | 49.3        | 23.7        |
| CASPT2/CBS(T,Q,5) <sup>d</sup>         | 0.0        | 17.3                     | 9.3                      | -298.3        | -38.6         | 14.5        | 50.8        | 23.7        |
| CASPT2/aug-cc-pVTZ                     | 0.0        | 19.2                     | -4.1                     | -305.4        | -44.8         | 17.6        | 42.8        | 27.4        |
| CASPT2/aug-cc-pVQZ                     | 0.0        | 20.2                     | -0.9                     | -306.2        | -42.8         | 17.9        | 44.9        | 29.3        |
| CASPT2/aug-cc-pV5Z                     | 0.0        |                          |                          | -306.1        |               |             |             |             |
| <b>CASPT2/CBS(aug-T,Q)<sup>b</sup></b> | <b>0.0</b> | <b>20.8</b>              | <b>1.2</b>               | <b>-306.8</b> | <b>-41.5</b>  | <b>18.1</b> | <b>46.3</b> | <b>30.7</b> |
| CASPT2/CBS(aug-Q,5) <sup>c</sup>       | 0.0        |                          |                          | -305.9        |               |             |             |             |
| CASPT2/CBS(aug-T,Q,5) <sup>d</sup>     | 0.0        |                          |                          | -305.6        |               |             |             |             |

<sup>a</sup>Geometries of all structures were optimized at the CCSD(T)/aug-cc-pVTZ level of theory, harmonic ZPE were computed using the same method and anharmonic corrections were evaluated at the PBE0/aug-cc-pVTZ level. ZPE with anharmonic corrections are included in the calculations of relative energies.

<sup>b</sup>The CBS(T,Q) energy is extrapolated as  $E(\text{VQZ}) + 0.69377 * \{E(\text{VQZ}) - E(\text{VTZ})\}$ .

<sup>c</sup>The CBS(Q,5) energy is extrapolated as  $E(\text{V5Z}) + 0.931445 * \{E(\text{V5Z}) - E(\text{VQZ})\}$ .

<sup>d</sup>The CBS(T,Q,5) energy is extrapolated using the exponential decay function in terms of the basis set cardinal number  $x = 3, 4, \text{ and } 5$ .

**Table S10.**

Parameters for the generation of vacuum ultraviolet (VUV) light used in this work. The uncertainty for VUV photon energies is less than 0.005 eV.

|                            |                                                            |                                                 |                                                 |
|----------------------------|------------------------------------------------------------|-------------------------------------------------|-------------------------------------------------|
| VUV energy (eV)            | 9.70<br>( $2\omega_1 - \omega_2$ )                         | 9.20<br>( $2\omega_1 - \omega_2$ )              | 8.25<br>( $2\omega_1 - \omega_2$ )              |
| VUV wavelength (nm)        | 127.819                                                    | 134.765                                         | 150.284                                         |
| Nonlinear medium           | Krypton                                                    | Xenon                                           | Xenon                                           |
| $\omega_1$ wavelength (nm) | 202.316                                                    | 222.566                                         | 249.628                                         |
| Nd:YAG output (nm)         | 532                                                        | 355                                             | 355                                             |
| Dye laser output (nm)      | 606.948                                                    | 445.132                                         | 499.256                                         |
| Dye                        | Rhodamine 610/640<br>(0.17/0.04 g L <sup>-1</sup> ethanol) | Coumarin 450<br>(0.2 g L <sup>-1</sup> ethanol) | Coumarin 503<br>(0.4 g L <sup>-1</sup> ethanol) |
| $\omega_2$ wavelength (nm) | 484.982                                                    | 638.667                                         | 736.448                                         |
| Nd:YAG output (nm)         | 355                                                        | 532                                             | 532                                             |
| Dye laser output (nm)      | 484.982                                                    | 638.667                                         | 736.448                                         |
| Dye                        | Coumarin 480<br>(0.4 g L <sup>-1</sup> ethanol)            | DCM<br>(0.3 g L <sup>-1</sup> DMSO)             | LDS 722<br>(0.25 g L <sup>-1</sup> ethanol)     |



**Table S11.**

Cartesian coordinates for C<sub>2</sub>H<sub>2</sub>O structures. CCSD(T)/aug-cc-pVTZ optimized geometry (distances in Angstrom), vibrational frequencies (cm<sup>-1</sup>) of neutral molecules, electronic energies E and E(CBS) (in hartree), zero-point vibrational energies (kcal/mol) as well as Anh. corr. (kcal/mol).

---

**ethynol**

|   |              |              |             |
|---|--------------|--------------|-------------|
| H | -1.539319641 | 0.829856603  | 0.000000000 |
| O | -1.175065699 | -0.063647434 | 0.000000000 |
| C | 0.142513804  | 0.011189067  | 0.000000000 |
| C | 1.350437908  | 0.003324672  | 0.000000000 |
| H | 2.412144728  | 0.007461759  | 0.000000000 |

E = -152.3039861

E(CBS) = -152.3776612

ZPVE = 19.7228

Anh. corr. = 0.238

**Frequency Intensity**

|           |          |
|-----------|----------|
| 355.1584  | 9.2506   |
| 378.5624  | 5.3712   |
| 527.2053  | 52.8696  |
| 610.2357  | 45.2486  |
| 1061.9691 | 78.9352  |
| 1270.1902 | 86.8722  |
| 2231.0818 | 128.804  |
| 3474.4798 | 84.2645  |
| 3799.153  | 114.2566 |

**ethynol radical cation**

|   |              |              |             |
|---|--------------|--------------|-------------|
| H | -2.424138646 | 0.011228422  | 0.000000000 |
| C | -1.349420840 | -0.007434067 | 0.000000000 |
| C | -0.102007022 | 0.037916682  | 0.000000000 |
| O | 1.139287507  | -0.072916693 | 0.000000000 |
| H | 1.624721991  | 0.783061062  | 0.000000000 |

E = -151.9477262

E(CBS) = -152.0081104

ZPVE = 19.1948

---

**formylcarbene singlet**

|   |              |              |              |
|---|--------------|--------------|--------------|
| H | -1.460937182 | 0.841630612  | 0.705032184  |
| C | -1.034814858 | 0.243311122  | -0.090299065 |
| C | -0.000958848 | -0.619432138 | 0.038600369  |

---

---

|   |             |              |              |
|---|-------------|--------------|--------------|
| O | 0.856471853 | 0.335413094  | -0.006169080 |
| H | 0.200887458 | -1.686471298 | 0.008443092  |

E = -152.2342135

E(CBS) = -152.3072744

ZPVE = 18.5247

Anh. corr. = 0.251

| Frequency | Intensity |
|-----------|-----------|
| 296.6473  | 36.4084   |
| 451.6903  | 229.0214  |
| 690.0529  | 76.5703   |
| 972.971   | 7.3336    |
| 1157.7451 | 34.0687   |
| 1399.239  | 39.9735   |
| 1518.6785 | 15.1998   |
| 3165.2661 | 6.7598    |
| 3228.3475 | 9.1788    |

---

**formylcarbene triplet**

|   |              |              |             |
|---|--------------|--------------|-------------|
| H | -2.276127960 | 0.152328439  | 0.000000000 |
| C | -1.271623243 | -0.252112350 | 0.000000000 |
| C | 0.011203868  | 0.381832802  | 0.000000000 |
| O | 1.090966506  | -0.200741892 | 0.000000000 |
| H | -0.030704594 | 1.489031800  | 0.000000000 |

E = -152.2396046

E(CBS) = -152.3100130

ZPVE = 18.5967

Anh. corr. = 0.240

| Frequency | Intensity |
|-----------|-----------|
| 466.9951  | 11.4264   |
| 468.6682  | 1.1648    |
| 873.7371  | 11.0643   |
| 949.0429  | 0.2516    |
| 1115.5953 | 48.1644   |
| 1387.0736 | 5.6099    |
| 1585.4944 | 74.991    |
| 2910.3849 | 51.1827   |
| 3216.4299 | 0.0856    |

**formylcarbene radical cation (quartet state)**

|   |              |              |             |
|---|--------------|--------------|-------------|
| H | -2.273621608 | 0.072144698  | 0.000000000 |
| C | -1.240042633 | -0.254296397 | 0.000000000 |

---

---

|   |              |              |             |
|---|--------------|--------------|-------------|
| C | -0.003032170 | 0.414026168  | 0.000000000 |
| O | 1.069253697  | -0.220096767 | 0.000000000 |
| H | 0.104868198  | 1.519075716  | 0.000000000 |

E = -151.8641170

E(CBS) = -151.9202896

ZPVE = 18.1417

---

**ketene**

|   |              |             |              |
|---|--------------|-------------|--------------|
| O | 0.000000000  | 0.000000000 | -1.188203868 |
| C | 0.000000000  | 0.000000000 | -0.020833195 |
| C | 0.000000000  | 0.000000000 | 1.298512327  |
| H | 0.942940379  | 0.000000000 | 1.822275579  |
| H | -0.942940379 | 0.000000000 | 1.822275579  |

E = -152.3691021

E(CBS) = -152.4307654

ZPVE = 19.6581

Anh. corr. = 0.216

**Frequency Intensity**

|           |          |
|-----------|----------|
| 434.5529  | 2.6533   |
| 506.8637  | 60.6434  |
| 587.6051  | 46.3401  |
| 989.9896  | 2.0512   |
| 1148.6591 | 4.4311   |
| 1411.5277 | 13.1207  |
| 2181.6866 | 597.6073 |
| 3192.6388 | 25.5261  |
| 3297.527  | 6.9494   |

**ketene radical cation**

|   |              |             |              |
|---|--------------|-------------|--------------|
| O | 0.000000000  | 0.000000000 | -1.188535282 |
| C | 0.000000000  | 0.000000000 | -0.060392428 |
| C | 0.000000000  | 0.000000000 | 1.334842625  |
| H | 0.959012275  | 0.000000000 | 1.844128657  |
| H | -0.959012275 | 0.000000000 | 1.844128657  |

E = -152.0180054

E(CBS) = -152.0772688

ZPVE = 19.5556

---

**oxiranylidene**

---

---

|   |              |              |              |
|---|--------------|--------------|--------------|
| O | -0.501388802 | 0.544504297  | 0.000000000  |
| C | -0.442094417 | -0.747807189 | 0.000000000  |
| C | 0.875395211  | -0.004714980 | 0.000000000  |
| H | 1.399082891  | 0.159237102  | 0.931289547  |
| H | 1.399082891  | 0.159237102  | -0.931289547 |

E = -152.2626507

E(CBS) = -152.3334567

ZPVE = 20.2229

Anh. corr. = 0.251

| Frequency | Intensity |
|-----------|-----------|
| 817.9362  | 30.7101   |
| 838.855   | 41.6549   |
| 885.0955  | 1.845     |
| 1101.4491 | 13.5458   |
| 1116.652  | 1.7738    |
| 1399.8045 | 32.5565   |
| 1519.1688 | 22.043    |
| 3146.0007 | 2.1293    |
| 3260.5395 | 3.7728    |

**oxiranylidene radical cation**

|   |              |              |              |
|---|--------------|--------------|--------------|
| O | -0.742156619 | 0.387278417  | 0.000000000  |
| C | -0.234199870 | -0.706492660 | 0.000000000  |
| C | 0.989752801  | 0.117266964  | 0.000000000  |
| H | 1.391162394  | 0.434709955  | 0.957824939  |
| H | 1.391162394  | 0.434709955  | -0.957824939 |

E = -151.9113247

E(CBS) = -151.9703272

ZPVE = 19.5899

---

**oxirene**

|   |             |              |              |
|---|-------------|--------------|--------------|
| H | 0.000000000 | 1.655416097  | 0.833013394  |
| C | 0.000000000 | 0.637527386  | 0.502199978  |
| O | 0.000000000 | 0.000000000  | -0.858514308 |
| C | 0.000000000 | -0.637527386 | 0.502199978  |
| H | 0.000000000 | -1.655416097 | 0.833013394  |

E = -152.2322559

E(CBS) = -152.3079364

ZPVE = 18.0425

Anh. corr. = 0.245

---

---

E(CBS, vertical triplet energy) = -152.2041980

| <b>Frequency</b> | <b>Intensity</b> |
|------------------|------------------|
| 187.6211         | 0.978            |
| 505.2871         | 77.4479          |
| 589.646          | 0                |
| 871.9501         | 56.0558          |
| 959.4067         | 6.8418           |
| 1063.3295        | 8.6286           |
| 1757.1488        | 3.622            |
| 3322.1987        | 47.295           |
| 3395.0532        | 2.7118           |

**oxirene-d<sub>2</sub>**

**Frequency**

184.9691  
378.3504  
486.5991  
671.9708  
744.0995  
996.3052  
1612.3625  
2436.3624  
2624.6654

ZPVE: 14.4898

**oxirene-<sup>13</sup>C<sub>2</sub>**

**Frequency**

182.1979  
503.0574  
581.3629  
868.1942  
953.3973  
1050.0613  
1697.5996  
3312.6092  
3376.0271

ZPVE: 17.9047

---

---

**oxirene radical cation**

|   |             |              |              |
|---|-------------|--------------|--------------|
| H | 0.000000000 | 1.695689729  | 0.753383961  |
| C | 0.000000000 | 0.654300945  | 0.460958687  |
| O | 0.000000000 | 0.000000000  | -0.786597940 |
| C | 0.000000000 | -0.654300945 | 0.460958687  |
| H | 0.000000000 | -1.695689729 | 0.753383961  |

E = -151.9319836

E(CBS) = -151.9917672

ZPVE = 19.2440

---

**TS1**

|   |              |              |              |
|---|--------------|--------------|--------------|
| H | -1.543948397 | 1.082500300  | 0.283804056  |
| C | -0.884778804 | 0.307549366  | -0.041573996 |
| O | 0.816440171  | 0.337399837  | 0.000968929  |
| C | -0.079728204 | -0.699803198 | 0.014627189  |
| H | 0.070670087  | -1.766781391 | 0.021669290  |

E = -152.2317062

E(CBS) = -152.3064973

ZPVE = 17.8351

Anh. corr. = 0.244

$\nu_i$  = 268.0464

---

**TS2**

|   |              |              |              |
|---|--------------|--------------|--------------|
| H | -1.726214663 | 0.366910914  | 0.903209042  |
| C | -1.293409365 | 0.200293197  | -0.097767460 |
| C | 0.012518619  | -0.394621461 | 0.015949355  |
| O | 1.072548598  | 0.217917731  | 0.003060475  |
| H | -0.044563270 | -1.511590102 | 0.022413133  |

E = -152.2255527

E(CBS) = -152.2981266

ZPVE = 17.3561

Anh. corr. = 0.240

$\nu_i$  = 402.5632

---

**TS3**

|   |              |              |              |
|---|--------------|--------------|--------------|
| O | -0.895020511 | 0.333300518  | 0.033919008  |
| C | -0.232179735 | -0.654870281 | -0.040303235 |
| C | 1.194162738  | 0.111821762  | -0.051833091 |
| H | 1.122618339  | 1.149446916  | -0.391629519 |
| H | 1.627839871  | 0.026817629  | 0.950361704  |

E = -152.2358648

E(CBS) = -152.2952409

Anh. corr. = 0.240

ZPVE = 17.5871

---



## REFERENCES

1. M. Berthelot, *Sceances Acad. Sci.* 70, 256 (1870). *Bull. Soc. Chim. France* [2] 14, 113 (1870).
2. E. G. Lewars, in *Modeling Marvels: Computational Anticipation of Novel Molecules* (Springer Netherlands, 2008), pp. 31–52.
3. S. J. Klippenstein, L. B. Harding, B. Ruscic, Ab initio computations and active thermochemical tables hand in hand: Heats of formation of core combustion species. *J. Phys. Chem. A* **121**, 6580–6602 (2017).
4. I. G. Csizmadia, J. Font, O. P. Strausz, Mechanism of the Wolff rearrangement. *J. Am. Chem. Soc.* **90**, 7360–7361 (1968).
5. S. A. Matlin, P. G. Sammes, Decomposition of  $\alpha$ -diazo-ketones: The oxiren–oxocarbene equilibrium. *J. Chem. Soc. Perkin Trans.* **1**, 2623–2630 (1972).
6. J. F. Liebman, A. Greenberg, A survey of strained organic molecules. *Chem. Rev.* **76**, 311–365 (1976).
7. R. C. Mawhinney, J. D. Goddard, Assessment of density functional theory for the prediction of the nature of the oxirene stationary point. *J. Mol. Struct. Theochem* **629**, 263–270 (2003).
8. E. Lewars, Benzooxirene. Ab initio calculations. *J. Mol. Struct. Theochem* **360**, 67–80 (1996).
9. O. P. Strausz, R. K. Gosavi, A. S. Denes, I. G. Csizmadia, Mechanism of the Wolff rearrangement. 6. Ab initio molecular orbital calculations on the thermodynamic and kinetic stability of the oxirene molecule. *J. Am. Chem. Soc.* **98**, 4784–4786 (1976).
10. C. Bachmann, T. Y. N'Guessan, F. Debu, M. Monnier, J. Pourcin, J. P. Aycard, H. Bodot, Oxirenes and ketocarbenes from  $\alpha$ -diazoketone photolysis: Experiments in rare gas matrices. Relative stabilities and isomerization barriers from MNDOC-BWEN calculations. *J. Am. Chem. Soc.* **112**, 7488–7497 (1990).



11. F. Turecek, D. E. Drinkwater, F. W. McLafferty, Gas-phase formation and rearrangements of methyloxirene and its cation radical. *J. Am. Chem. Soc.* **113**, 5958–5964 (1991).
12. W. J. Bouma, R. H. Nobes, L. Radom, C. Woodward, Existence of stable structural isomers of ketene. A theoretical study of the C<sub>2</sub>H<sub>2</sub>O potential energy surface. *J. Org. Chem.* **47**, 1869–1875 (1982).
13. A. P. Scott, R. H. Nobes, H. F. Schaefer, L. Radom, The Wolff rearrangement: The relevant portion of the oxirene-ketene potential energy hypersurface. *J. Am. Chem. Soc.* **116**, 10159–10164 (1994).
14. W. Kirmse, 100 years of the Wolff rearrangement. *Eur. J. Org. Chem.* **2002**, 2193–2256 (2002).
15. M. Torres, J. L. Bourdelande, A. Clement, O. P. Strausz, Argon-matrix isolation of bis(trifluoromethyl)oxirene, perfluoromethylethyloxirene, and their isomeric ketocarbenes. *J. Am. Chem. Soc.* **105**, 1698–1700 (1983).
16. P. Carsky, B. A. Hess Jr., L. J. Schaad, Ab initio study of the structures and vibrational spectra of the Hueckel 4n heterocycles azirine, oxirene and thiirene. *J. Am. Chem. Soc.* **105**, 396–402 (1983).
17. G. Vacek, J. M. Galbraith, Y. Yamaguchi, H. F. Schaefer, R. H. Nobes, A. P. Scott, L. Radom, Oxirene: To be or not to be? *J. Phys. Chem.* **98**, 8660–8665 (1994).
18. P. J. Wilson, D. J. Tozer, A Kohn-Sham study of the oxirene-ketene potential energy surface. *Chem. Phys. Lett.* **352**, 540–544 (2002).
19. E. G. Lewars, in *Computational Chemistry: Introduction to the Theory and Applications of Molecular and Quantum Mechanics* (Springer International Publishing, 2016), pp. 613–643.
20. A. Rey Planells, A. Espinosa Ferao, Accurate ring strain energies of unsaturated three-membered heterocycles with one group 13–16 element. *Inorg. Chem.* **61**, 6459–6468 (2022).

21. A. Karton, D. Talbi, Pinning the most stable  $H_xC_yO_z$  isomers in space by means of high-level theoretical procedures. *Chem. Phys.* **436-437**, 22–28 (2014).
22. M. Torres, A. Clement, O. P. Strausz, Photolysis of vinylene thioxocarbonates: A new source of ketocarbenes. *J. Org. Chem.* **45**, 2271–2273 (1980).
23. C. E. C. A. Hop, J. L. Holmes, J. K. Terlouw, The oxirene radical cation and its neutralization in the gas phase. *J. Am. Chem. Soc.* **111**, 441–445 (1989).
24. R. Hochstrasser, J. Wirz, Reversible photoisomerization of ketene to ethynol. *Angew. Chem. Int. Ed.* **29**, 411–413 (1990).
25. J. P. Toscano, M. S. Platz, V. Nikolaev, Lifetimes of simple ketocarbenes. *J. Am. Chem. Soc.* **117**, 4712–4713 (1995).
26. J. P. Toscano, M. S. Platz, V. Nikolaev, Y. Cao, M. B. Zimmt, The lifetime of formylcarbene determined by transient absorption and transient grating spectroscopy. *J. Am. Chem. Soc.* **118**, 3527–3528 (1996).
27. A. M. Turner, R. I. Kaiser, Exploiting photoionization reflectron time-of-flight mass spectrometry to explore molecular mass growth processes to complex organic molecules in interstellar and solar system ice analogs. *Acc. Chem. Res.* **53**, 2791–2805 (2020).
28. A. M. Turner, A. S. Koutsogiannis, N. F. Kleimeier, A. Bergantini, C. Zhu, R. C. Fortenberry, R. I. Kaiser, An experimental and theoretical investigation into the formation of ketene ( $H_2CCO$ ) and ethynol ( $HCCOH$ ) in interstellar analog ices. *Astrophys. J.* **896**, 88 (2020).
29. S. Maity, R. I. Kaiser, B. M. Jones, Formation of complex organic molecules in methanol and methanol–carbon monoxide ices exposed to ionizing radiation—A combined FTIR and reflectron time-of-flight mass spectrometry study. *Phys. Chem. Chem. Phys.* **17**, 3081–3114 (2015).

30. N. F. Kleimeier, A. M. Turner, R. C. Fortenberry, R. I. Kaiser, On the formation of the popcorn flavorant 2,3-butanedione ( $\text{CH}_3\text{COCOCH}_3$ ) in acetaldehyde-containing interstellar ices. *ChemPhysChem* **21**, 1531–1540 (2020).
31. R. L. Hudson, M. J. Loeffler, Ketene formation in interstellar ices: A laboratory study. *Astrophys. J.* **773**, 109 (2013).
32. G. Maier, H. P. Reisenauer, M. Cibulka, Oxiranylidene. *Angew. Chem. Int. Ed.* **38**, 105–108 (1999).
33. S. G. Lias, Ionization energy evaluation, in NIST Chemistry WebBook. *NIST Chemistry WebBook, NIST Standard Reference Database Number 69, National Institute of Standards and Technology.*
34. M. J. Abplanalp, R. I. Kaiser, On the formation of complex organic molecules in the interstellar medium: Untangling the chemical complexity of carbon monoxide-hydrocarbon containing ice analogues exposed to ionizing radiation via a combined infrared and reflectron time-of-flight analysis. *Phys. Chem. Chem. Phys.* **21**, 16949–16980 (2019).
35. S. Maity, R. I. Kaiser, B. M. Jones, Infrared and reflectron time-of-flight mass spectroscopic study on the synthesis of glycolaldehyde in methanol ( $\text{CH}_3\text{OH}$ ) and methanol–carbon monoxide ( $\text{CH}_3\text{OH-CO}$ ) ices exposed to ionization radiation. *Faraday Discuss.* **168**, 485–516 (2014).
36. S. Kobatake, S. Takami, H. Muto, T. Ishikawa, M. Irie, Rapid and reversible shape changes of molecular crystals on photoirradiation. *Nature* **446**, 778–781 (2007).
37. M. Irie, T. Fukaminato, T. Sasaki, N. Tamai, T. Kawai, A digital fluorescent molecular photoswitch. *Nature* **420**, 759–760 (2002).
38. D. Mei, A. M. Karim, Y. Wang, On the reaction mechanism of acetaldehyde decomposition on Mo (110). *ACS Catal.* **2**, 468–478 (2012).

39. N. F. Kleimeier, A. K. Eckhardt, R. I. Kaiser, A mechanistic study on the formation of acetic acid ( $\text{CH}_3\text{COOH}$ ) in polar interstellar analog ices exploiting photoionization reflectron time-of-flight mass spectrometry. *Astrophys. J.* **901**, 84 (2020).
40. C.-S. Lam, J. D. Adams, L. J. Butler, The onset of  $\text{H}^+$  ketene products from vinoxy radicals prepared by photodissociation of chloroacetaldehyde at 157 nm. *J. Phys. Chem. A* **120**, 2521–2536 (2016).
41. V. Saheb, S. R. Hashemi, S. M. A. Hosseini, Theoretical studies on the kinetics of multi-channel gas-phase unimolecular decomposition of acetaldehyde. *J. Phys. Chem. A* **121**, 6887–6895 (2017).
42. J. Guan, K. R. Randall, H. F. Schaefer III, H. Li, Formylmethylene: The triplet ground state and the lowest singlet state. *J. Phys. Chem. A* **117**, 2152–2159 (2013).
43. T. J. Lee, P. R. Taylor, A diagnostic for determining the quality of single-reference electron correlation methods. *Int. J. Quantum Chem.* **36**, 199–207 (1989).
44. P. Celani, H.-J. Werner, Multireference perturbation theory for large restricted and selected active space reference wave functions. *J. Chem. Phys.* **112**, 5546–5557 (2000).
45. T. Shiozaki, W. Győrffy, P. Celani, H.-J. Werner, Communication: Extended multi-state complete active space second-order perturbation theory: Energy and nuclear gradients. *J. Chem. Phys.* **135**, 081106 (2011).
46. D. J. Goebbert, D. Khuseynov, A. Sanov,  $\text{O}^- + \text{acetaldehyde}$  reaction products: Search for singlet formylmethylene, a Wolff rearrangement intermediate. *J. Phys. Chem. A* **115**, 3208–3217 (2011).
47. J. Cao, Generalized resonance energy transfer theory: Applications to vibrational energy flow in optical cavities. *J. Phys. Chem. Lett.* **13**, 10943–10951 (2022).

48. M. J. Barlow, B. M. Swinyard, P. J. Owen, J. Cernicharo, H. L. Gomez, R. J. Ivison, O. Krause, T. L. Lim, M. Matsuura, S. Miller, G. Olofsson, E. T. Polehampton, Detection of a noble gas molecular ion,  $^{36}\text{ArH}^+$ , in the Crab Nebula. *Science* **342**, 1343–1345 (2013).
49. J. Cernicharo, C. Kahane, J. Gomez-Gonzalez, M. Guelin, Tentative detection of the  $\text{C}_5\text{H}$  radical. *Astron. Astrophys.* **164**, L1–L4 (1986).
50. L. N. Zack, D. T. Halfen, L. M. Ziurys, Detection of  $\text{FeCN}$  ( $X^4\Delta_i$ ) in IRC+10216: A new interstellar molecule. *Astrophys. J.* **733**, L36 (2011).
51. A. M. Turner, M. J. Abplanalp, S. Y. Chen, Y. T. Chen, A. H. Chang, R. I. Kaiser, A photoionization mass spectroscopic study on the formation of phosphanes in low temperature phosphine ices. *Phys. Chem. Chem. Phys.* **17**, 27281–27291 (2015).
52. M. Bouilloud, N. Fray, Y. Benilan, H. Cottin, M. C. Gazeau, A. Jolly, Bibliographic review and new measurements of the infrared band strengths of pure molecules at 25 K:  $\text{H}_2\text{O}$ ,  $\text{CO}_2$ ,  $\text{CO}$ ,  $\text{CH}_4$ ,  $\text{NH}_3$ ,  $\text{CH}_3\text{OH}$ ,  $\text{HCOOH}$  and  $\text{H}_2\text{CO}$ . *Mon. Not. R. Astron. Soc.* **451**, 2145–2160 (2015).
53. R. L. Hudson, F. M. Coleman, Infrared intensities and molar refraction of amorphous dimethyl carbonate—Comparisons to four interstellar molecules. *Phys. Chem. Chem. Phys.* **21**, 11284–11289 (2019).
54. D. M. Hudgins, S. A. Sandford, L. J. Allamandola, A. G. Tielens, Mid- and far-infrared spectroscopy of ices: Optical constants and integrated absorbances. *Astrophys. J. Suppl. Ser.* **86**, 713–870 (1993).
55. C. Zhu, A. M. Turner, C. Meinert, R. I. Kaiser, On the production of polyols and hydroxycarboxylic acids in interstellar analogous ices of methanol. *Astrophys. J.* **889**, 134 (2020).
56. D. Drouin, A. R. Couture, D. Joly, X. Tastet, V. Aimez, R. Gauvin, CASINO V2.42—A fast and easy-to-use modeling tool for scanning electron microscopy and microanalysis users. *Scanning* **29**, 92–101 (2007).

57. M. J. Frisch, G. W. Trucks, H. B. Schlegel, G. E. Scuseria, M. A. Robb, J. R. Cheeseman, G. Scalmani, V. Barone, G. A. Petersson, H. Nakatsuji, X. Li, M. Caricato, A. V. Marenich, J. Bloino, B. G. Janesko, R. Gomperts, B. Mennucci, H. P. Hratchian, J. V. Ortiz, A. F. Izmaylov, J. L. Sonnenberg, Williams, F. Ding, F. Lipparini, F. Egidi, J. Goings, B. Peng, A. Petrone, T. Henderson, D. Ranasinghe, V. G. Zakrzewski, J. Gao, N. Rega, G. Zheng, W. Liang, M. Hada, M. Ehara, K. Toyota, R. Fukuda, J. Hasegawa, M. Ishida, T. Nakajima, Y. Honda, O. Kitao, H. Nakai, T. Vreven, K. Throssell, J. A. Montgomery Jr., J. E. Peralta, F. Ogliaro, M. J. Bearpark, J. J. Heyd, E. N. Brothers, K. N. Kudin, V. N. Staroverov, T. A. Keith, R. Kobayashi, J. Normand, K. Raghavachari, A. P. Rendell, J. C. Burant, S. S. Iyengar, J. Tomasi, M. Cossi, J. M. Millam, M. Klene, C. Adamo, R. Cammi, J. W. Ochterski, R. L. Martin, K. Morokuma, O. Farkas, J. B. Foresman, D. J. Fox, *Gaussian 16* (Gaussian Inc., 2016).
58. A. D. Becke, Density-functional exchange-energy: Approximation with correct asymptotic behavior. *Phys. Rev. A* **38**, 3098–3100 (1988).
59. C. Lee, W. Yang, R. G. Parr, Development of the Colle-Salvetti correlation-energy formula into a functional of the electron density. *Phys. Rev. B* **37**, 785–789 (1988).
60. A. D. Becke, Density-functional thermochemistry. III. The role of exact exchange. *J. Chem. Phys.* **98**, 5648–5652 (1993).
61. T. H. Dunning, Gaussian basis sets for use in correlated molecular calculations. I. The atoms boron through neon and hydrogen. *J. Chem. Phys.* **90**, 1007–1023 (1989).
62. D. A. Matthews, L. Cheng, M. E. Harding, F. Lipparini, S. Stopkowicz, T.-C. Jagau, P. G. Szalay, J. Gauss, J. F. Stanton, Coupled-cluster techniques for computational chemistry: The CFOUR program package. *J. Chem. Phys.* **152**, 214108 (2020).
63. J. Čížek, On the correlation problem in atomic and molecular systems. Calculation of wavefunction components in Ursell-type expansion using quantum-field theoretical methods. *J. Chem. Phys.* **45**, 4256–4266 (1966).

64. K. Raghavachari, Electron correlation techniques in quantum chemistry: Recent advances. *Annu. Rev. Phys. Chem.* **42**, 615–642 (1991).
65. R. J. Bartlett, J. D. Watts, S. A. Kucharski, J. Noga, Non-iterative fifth-order triple and quadruple excitation energy corrections in correlated methods. *Chem. Phys. Lett.* **165**, 513–522 (1990).
66. R. A. Kendall, T. H. Dunning Jr, R. J. Harrison, Electron affinities of the first-row atoms revisited. Systematic basis sets and wave functions. *J. Chem. Phys.* **96**, 6796–6806 (1992).
67. J. F. Stanton, Why CCSD(T) works: A different perspective. *Chem. Phys. Lett.* **281**, 130–134 (1997).
68. F. Neese, Software update: The ORCA program system, version 4.0. *WIREs Comput. Mol. Sci.* **8**, e1327 (2018).
69. K. A. Peterson, D. E. Woon, T. H. Dunning Jr., Benchmark calculations with correlated molecular wave functions. IV. The classical barrier height of the  $\text{H}+\text{H}_2\rightarrow\text{H}_2+\text{H}$  reaction. *J. Chem. Phys.* **100**, 7410–7415 (1994).
70. H.-J. Werner, P. J. Knowles, G. Knizia, F. R. Manby, M. Schütz, P. Celani, W. Györffy, D. Kats, T. Korona, R. Lindh, A. Mitrushenkov, G. Rauhut, K. R. Shamasundar, T. B. Adler, R. D. Amos, S. J. Bennie, A. Bernhardsson, A. Berning, D. L. Cooper, M. J. O. Deegan, A. J. Dobbyn, F. Eckert, E. Goll, C. Hampel, A. Hesselmann, G. Hetzer, T. Hrenar, G. Jansen, C. Köppl, S. J. R. Lee, Y. Liu, A. W. Lloyd, Q. Ma, R. A. Mata, A. J. May, S. J. McNicholas, W. Meyer, T. F. Miller III, M. E. Mura, A. Nicklass, D. P. O’Neill, P. Palmieri, D. Peng, T. Petrenko, K. Pflüger, R. Pitzer, M. Reiher, T. Shiozaki, H. Stoll, A. J. Stone, R. Tarroni, T. Thorsteinsson, M. Wang, and M. Welborn, MOLPRO, version 2021.2. A package of ab initio programs (University of Cardiff, 2021); [www.molpro.net](http://www.molpro.net).
71. N. F. Kleimeier, A. K. Eckhardt, R. I. Kaiser, Identification of glycolaldehyde enol ( $\text{HOHC}=\text{CHOH}$ ) in interstellar analogue ices. *J. Am. Chem. Soc.* **143**, 14009–14018 (2021).

72. N. F. Kleimeier, R. I. Kaiser, Interstellar enolization-acetaldehyde ( $\text{CH}_3\text{CHO}$ ) and vinyl alcohol ( $\text{H}_2\text{CCH}(\text{OH})$ ) as a case study. *ChemPhysChem* **22**, 1229–1236 (2021).
73. C. Zhu, N. F. Kleimeier, A. M. Turner, S. K. Singh, R. C. Fortenberry, R. I. Kaiser, Synthesis of methanediol [ $\text{CH}_2(\text{OH})_2$ ]: The simplest geminal diol. *Proc. Natl. Acad. Sci. U.S.A.* **119**, e2111938119 (2022).
74. C. Zhu, R. Frigge, A. Bergantini, R. C. Fortenberry, R. I. Kaiser, Untangling the formation of methoxymethanol ( $\text{CH}_3\text{OCH}_2\text{OH}$ ) and dimethyl peroxide ( $\text{CH}_3\text{OOCH}_3$ ) in star-forming regions. *Astrophys. J.* **881**, 156 (2019).
